# Supplementary material for: Species-level view of population structure and gene flow for a critically endangered primate (Varecia variegata)
Source: PubMed Central journal article supplement (PMC4113292; doi:10.1002/ece3.1119), 2014-06-06
Supplement: ece30004-2675-SD4.pdf [file ece30004-2675-SD4.pdf]

Table S1. Characteristics of 10 microsatellite markers amplified in 209 *V. variegata* samples, including the number of alleles per locus ( $n_A$ ), observed ( $H_o$ ) and expected ( $H_e$ ) heterozygosity, and deviations from Hardy-Weinberg Equilibrium (HWE). Significant values at  $p < 0.05$  are shown in **bold**.

| Marker   | Size range | Annealing |  | $n_A$ | $H_o$ | $H_e$ | HWE              | GenBank  | Reference         |
|----------|------------|-----------|--|-------|-------|-------|------------------|----------|-------------------|
|          |            | temp.     |  |       |       |       |                  |          |                   |
| 51HDZ20  | 221-241    | 50        |  | 13    | 0.514 | 0.543 | 0.244            | AF468499 | Louis et al. 2005 |
| 51HDZ25  | 169-175    | 54        |  | 5     | 0.45  | 0.498 | 0.083            | AF468500 | Louis et al. 2005 |
| 51HDZ204 | 129-139    | 60        |  | 4     | 0.399 | 0.535 | <b>&lt;0.001</b> | AF468503 | Louis et al. 2005 |
| 51HDZ247 | 249-265    | 50        |  | 10    | 0.596 | 0.701 | <b>0.001</b>     | AF468504 | Louis et al. 2005 |
| 51HDZ560 | 253-259    | 52        |  | 10    | 0.516 | 0.571 | <b>0.021</b>     | AF468508 | Louis et al. 2005 |
| 51HDZ598 | 201-217    | 50        |  | 9     | 0.611 | 0.613 | 0.332            | AF468509 | Louis et al. 2005 |
| 51HDZ691 | 233-251    | 50        |  | 13    | 0.61  | 0.622 | 0.748            | AF468512 | Louis et al. 2005 |
| 51HDZ790 | 211-215    | 50        |  | 5     | 0.306 | 0.346 | 0.251            | AF468513 | Louis et al. 2005 |
| 51HDZ816 | 280-292    | 54        |  | 10    | 0.621 | 0.667 | 0.188            | AF468514 | Louis et al. 2005 |
| 51HDZ988 | 102-116    | 50        |  | 10    | 0.575 | 0.615 | 0.975            | AF468519 | Louis et al. 2005 |
