# Supplementary material for: Species-level view of population structure and gene flow for a critically endangered primate (Varecia variegata)
Source: PubMed Central journal article supplement (PMC4113292; doi:10.1002/ece3.1119), 2014-06-06
Supplement: ece30004-2675-SD5.pdf [file ece30004-2675-SD5.pdf]

**Table S2. Allelic diversity within each of 19 sampling localities, including mean number of alleles per locus (MNA), allelic richness (AR), observed ( $H_O$ ) and expected ( $H_S$ ) heterozygosity, inbreeding coefficient ( $F_{IS}$ ), and significant deviations from Hardy-Weinberg Equilibrium (HWE) calculated using 10 000 iterations**

| Site                           | Geographic region | N   | MNA  | AR (SE)      | $H_O$ | $H_S$ | $F_{IS}$ | HWE          |
|--------------------------------|-------------------|-----|------|--------------|-------|-------|----------|--------------|
| Nosy Mangabe S.R. †            | North             | 9   | 3.3  | 1.99 (0.165) | 0.367 | 0.478 | 0.233    | -            |
| Marotandrano S.R.              | North             | 9   | 4.2  | 2.50 (0.178) | 0.556 | 0.672 | 0.173    | -            |
| Mananara Nord N.P.             | North             | 8   | 4.0  | 2.40 (0.128) | 0.575 | 0.634 | 0.093    | -            |
| Ambatovaky S.R.                | North             | 5   | 3.4  | 2.39 (0.192) | 0.400 | 0.640 | 0.375    | -            |
| Zahamena N.P., S.N.R.          | North             | 10  | 4.7  | 2.52 (0.182) | 0.620 | 0.658 | 0.058    | 0.167        |
| Betampona S.N.R.               | North             | 9   | 3.6  | 2.26 (0.140) | 0.544 | 0.594 | 0.083    | -            |
| Mangerivola S.R.               | North             | 3   | 3.3  | 2.61 (0.275) | 0.633 | 0.667 | 0.050    | -            |
| Mantadia Andasibe N.P.         | North             | 14  | 3.7  | 2.24 (0.194) | 0.514 | 0.573 | 0.103    | 0.061        |
| Torotorofotsy                  | North             | 3   | 2.5  | 2.10 (0.245) | 0.533 | 0.483 | -0.103   | -            |
| Maromizaha U.F.                | North             | 2   | 2.2  | 2.20 (0.291) | 0.700 | 0.500 | -0.400   | -            |
| Anosibe an'ala C.F.            | North             | 8   | 3.5  | 2.31 (0.183) | 0.493 | 0.602 | 0.181    | -            |
| Fandriana U.F.                 | South             | 11  | 4.5  | 2.33 (0.161) | 0.536 | 0.609 | 0.119    | <b>0.030</b> |
| Vatoharanana (Ranomafana N.P.) | South             | 10  | 3.6  | 2.20 (0.149) | 0.490 | 0.566 | 0.134    | <b>0.035</b> |
| Mangevo (Ranomafana N.P.)      | South             | 30  | 3.9  | 2.41 (0.110) | 0.627 | 0.648 | 0.032    | 0.215        |
| Kianjavato U.F.                | South             | 32  | 3.6  | 1.95 (0.161) | 0.459 | 0.460 | 0.001    | 0.500        |
| Vatovavy U.F.                  | South             | 21  | 2.9  | 1.97 (0.132) | 0.468 | 0.487 | 0.038    | 0.293        |
| Lakia                          | South             | 10  | 2.6  | 2.04 (0.110) | 0.460 | 0.527 | 0.128    | 0.062        |
| Tolongoina U.F.                | South             | 4   | 2.8  | 2.12 (0.268) | 0.400 | 0.504 | 0.207    | -            |
| Manombo S.R.                   | South             | 11  | 2.7  | 2.00 (0.149) | 0.500 | 0.488 | -0.025   | 0.388        |
| Overall                        |                   | 209 | 10.2 | 2.25 (0.182) | 0.519 | 0.573 | 0.094    |              |

N = no. samples successfully analyzed; MNA = mean number of alleles per locus; AR = Allelic diversity after correcting for sample size with rarefaction (standard error);  $H_O$  = observed heterozygosity;  $H_S$  = expected heterozygosity assuming HWE corrected for sampling bias (Simpson's Diversity Index);  $F_{IS}$  = inbreeding coefficient; HWE = one-sided  $p$  calculated using 10 000 permutations. Significant values indicated in **bold**. '†' indicates populations with < 10 samples that were not tested for Hardy-Weinberg Equilibrium.
