# Supplementary material for: Species-level view of population structure and gene flow for a critically endangered primate (Varecia variegata)
Source: PubMed Central journal article supplement (PMC4113292; doi:10.1002/ece3.1119), 2014-06-06
Supplement: ece30004-2675-SD6.pdf [file ece30004-2675-SD6.pdf]

Table S3. Pairwise  $F_{ST}$  values (above diagonal) and significance values (below diagonal) among sampling localities and populations of *V. variegata*. Significant values indicated with \* ( $P < 0.0003$  after Bonferroni corrections)

|                |               | Northern sites |               |               |            |          |           |             |          |               |            |         |
|----------------|---------------|----------------|---------------|---------------|------------|----------|-----------|-------------|----------|---------------|------------|---------|
|                |               | NosyMangabe    | Marontandrano | Mananara Nord | Ambatovaky | Zahamena | Betampona | Mangerivola | Mantadia | Torotorofotsy | Maromizaha | Anosibe |
| Northern sites | NosyMangabe   | --             | 0.203         | 0.127         | 0.161      | 0.194    | 0.225     | 0.179       | 0.291    | 0.361         | 0.383      | 0.307   |
|                | Marontandrano | *              | --            | 0.092         | 0.080      | 0.038    | 0.091     | 0.065       | 0.174    | 0.221         | 0.205      | 0.189   |
|                | MananaraNord  | NS             | NS            | --            | 0.094      | 0.111    | 0.130     | 0.129       | 0.209    | 0.270         | 0.257      | 0.243   |
|                | Ambatovaky    | NS             | NS            | NS            | --         | 0.084    | 0.091     | 0.002       | 0.114    | 0.146         | 0.132      | 0.168   |
|                | Zahamena      | *              | NS            | *             | NS         | --       | 0.137     | 0.090       | 0.138    | 0.176         | 0.156      | 0.148   |
|                | Betampona     | *              | NS            | *             | NS         | *        | --        | 0.035       | 0.119    | 0.233         | 0.201      | 0.167   |
|                | Mangerivola   | NS             | NS            | NS            | NS         | NS       | NS        | --          | 0.071    | 0.162         | 0.139      | 0.090   |
|                | Mantadia      | *              | *             | *             | NS         | *        | *         | NS          | --       | 0.051         | 0.055      | 0.068   |
|                | Torotorofotsy | NS             | NS            | NS            | NS         | NS       | NS        | NS          | NS       | --            | 0.120      | 0.133   |
|                | Maromizaha    | NS             | NS            | NS            | NS         | NS       | NS        | NS          | NS       | NS            | --         | 0.067   |
| Anosibe        | *             | *              | *             | *             | *          | *        | NS        | NS          | NS       | NS            | --         |         |
| N              |               | 9              | 9             | 8             | 5          | 10       | 9         | 3           | 14       | 3             | 2          | 8       |

|                |            | Southern sites |       |         |            |          |       |            |         |
|----------------|------------|----------------|-------|---------|------------|----------|-------|------------|---------|
|                |            | Fandriana      | Vato  | Mangevo | Kianjavato | Vatovavy | Lakia | Tolongoina | Manombo |
| Southern sites | Fandriana  | --             | 0.145 | 0.104   | 0.203      | 0.155    | 0.190 | 0.189      | 0.213   |
|                | Vato       | *              | --    | 0.089   | 0.284      | 0.241    | 0.282 | 0.235      | 0.278   |
|                | Mangevo    | *              | *     | --      | 0.241      | 0.179    | 0.193 | 0.227      | 0.206   |
|                | Kianjavato | *              | *     | *       | --         | 0.176    | 0.123 | 0.339      | 0.287   |
|                | Vatovavy   | *              | *     | *       | *          | --       | 0.160 | 0.251      | 0.269   |
|                | Lakia      | NS             | NS    | *       | *          | *        | --    | 0.292      | 0.222   |
|                | Tolongoina | *              | *     | *       | *          | *        | NS    | --         | 0.297   |
|                | Manombo    | *              | *     | *       | *          | *        | NS    | *          | --      |
| N              |            | 11             | 10    | 30      | 32         | 21       | 10    | 4          | 11      |
