# Supplementary material for: Species-level view of population structure and gene flow for a critically endangered primate (Varecia variegata)
Source: PubMed Central journal article supplement (PMC4113292; doi:10.1002/ece3.1119), 2014-06-06
Supplement: ece30004-2675-SD7.pdf [file ece30004-2675-SD7.pdf]

**Table S4. Measures of haplotype diversity across sampling localities, including the number of samples analyzed (n), the number of polymorphic sites (S), haplotype diversity (h), and nucleotide diversity ( $\pi$ )**

| Site                           | Geographic |     |    |                |        |        |
|--------------------------------|------------|-----|----|----------------|--------|--------|
|                                | region     | n   | S  | No. haplotypes | h      | $\pi$  |
| Nosy Mangabe S.R.†             | North      | 9   | 1  | 2              | 0.2222 | 0.0004 |
| Marotandrano S.R.              | North      | 9   | 5  | 2              | 0.3889 | 0.0035 |
| Mananara Nord N.P.             | North      | 8   | 3  | 2              | 0.2500 | 0.0013 |
| Ambatovaky S.R.                | North      | 5   | 3  | 2              | 0.4000 | 0.0021 |
| Zahamena N.P., S.N.R.          | North      | 11  | 19 | 3              | 0.6364 | 0.0172 |
| Betampona S.N.R.               | North      | 9   | 20 | 2              | 0.3889 | 0.0139 |
| Mangerivola S.R.               | North      | 3   | 0  | 1              | 0.0000 | 0.0000 |
| Mantadia Andasibe N.P.         | North      | 14  | 9  | 2              | 0.4945 | 0.0080 |
| Torotorofotsy                  | North      | 3   | 9  | 2              | 0.6667 | 0.0107 |
| Maromizaha U.F.                | North      | 4   | 0  | 1              | 0.0000 | 0.0000 |
| Anosibe an'ala C.F.            | North      | 8   | 0  | 1              | 0.0000 | 0.0000 |
| Fandriana U.F.                 | South      | 11  | 0  | 1              | 0.0000 | 0.0000 |
| Vatoharanana (Ranomafana N.P.) | South      | 10  | 0  | 1              | 0.0000 | 0.0000 |
| Mangevo (Ranomafana N.P.)      | South      | 8   | 0  | 1              | 0.0000 | 0.0000 |
| Kianjavato U.F.                | South      | 12  | 0  | 1              | 0.0000 | 0.0000 |
| Vatovavy U.F.                  | South      | 10  | 0  | 1              | 0.0000 | 0.0000 |
| Lakia                          | South      | 10  | 0  | 1              | 0.0000 | 0.0000 |
| Tolongoina U.F.                | South      | 4   | 0  | 1              | 0.0000 | 0.0000 |
| Manombo S.R.                   | South      | 11  | 0  | 1              | 0.0000 | 0.0000 |
| Overall                        |            | 159 | 44 | 19             | 0.8557 | 0.0190 |

n = no. samples analyzed; S = no. polymorphic sites; h = haplotype diversity;  $\pi$  = nucleotide diversity
