# Supplementary material for: Species-level view of population structure and gene flow for a critically endangered primate (Varecia variegata)
Source: PubMed Central journal article supplement (PMC4113292; doi:10.1002/ece3.1119), 2014-06-06
Supplement: ece30004-2675-SD8.pdf [file ece30004-2675-SD8.pdf]

Table S5. Pairwise PhiPT values (FST analog; above diagonal) and significance values (below diagonal) among sampling localities and populations of *V. variegata*. Significant values indicated with \* ( $P < 0.003$  after Bonferroni corrections)

|                |               | Northern sites |               |              |            |          |           |             |          |               |            |         |
|----------------|---------------|----------------|---------------|--------------|------------|----------|-----------|-------------|----------|---------------|------------|---------|
|                |               | NosyMangabe    | Marontandrano | MananaraNord | Ambatovaky | Zahamena | Betampona | Mangerivola | Mantadia | Torotorofotsy | Maromizaha | Anosibe |
| Northern sites | Nosy Mangabe  | --             | 0.8425        | 0.9203       | 0.9816     | 0.7594   | 0.8387    | 0.9926      | 0.8696   | 0.9270        | 0.9933     | 0.6834  |
|                | Marontandrano | *              | --            | 0.7190       | 0.9245     | 0.6774   | 0.7779    | 0.9124      | 0.7834   | 0.8022        | 0.9016     | 0.6216  |
|                | MananaraNord  | *              | NS            | --           | 0.9570     | 0.7130   | 0.7988    | 0.9664      | 0.8352   | 0.8810        | 0.9669     | 0.6451  |
|                | Ambatovaky    | *              | NS            | NS           | --         | 0.5191   | 0.5280    | 0.9635      | 0.7448   | 0.7919        | 0.9567     | 0.5456  |
|                | Zahamena      | *              | *             | *            | NS         | --       | 0.1117    | 0.5461      | 0.4925   | 0.3340        | 0.4601     | 0.4310  |
|                | Betampona     | *              | *             | *            | NS         | NS       | --        | 0.7119      | 0.6577   | 0.5574        | 0.6662     | 0.5005  |
|                | Mangerivola   | NS             | NS            | NS           | NS         | NS       | NS        | --          | 0.6393   | 0.6857        | 0.0000     | 0.4003  |
|                | Mantadia      | *              | *             | *            | *          | *        | *         | NS          | --       | 0.0000        | 0.2628     | 0.3985  |
|                | Torotorofotsy | NS             | NS            | NS           | NS         | NS       | NS        | NS          | NS       | --            | 0.1111     | 0.1930  |
|                | Maromizaha    | NS             | NS            | NS           | NS         | NS       | NS        | NS          | NS       | NS            | --         | 0.4049  |
| Anosibe        | *             | *              | NS            | *            | *          | *        | NS        | *           | NS       | NS            | --         |         |
| N              |               | 9              | 9             | 8            | 5          | 11       | 9         | 3           | 14       | 3             | 4          | 8       |

  

|                |            | Southern sites |        |         |            |          |        |            |         |
|----------------|------------|----------------|--------|---------|------------|----------|--------|------------|---------|
|                |            | Fandriana      | Vato   | Mangevo | Kianjavato | Vatovavy | Lakia  | Tolongoina | Manombo |
| Southern sites | Fandriana  | --             | 0.0000 | 0.0000  | 0.0000     | 0.0000   | 0.0000 | 0.0000     | 0.0000  |
|                | Vato       | NS             | --     | 0.0000  | 0.0000     | 0.0000   | 0.0000 | 0.0000     | 0.0000  |
|                | Mangevo    | NS             | NS     | --      | 0.0000     | 0.0000   | 0.0000 | 0.0000     | 0.0000  |
|                | Kianjavato | NS             | NS     | NS      | --         | 0.0000   | 0.0000 | 0.0000     | 0.0000  |
|                | Vatovavy   | NS             | NS     | NS      | NS         | --       | 0.0000 | 0.0000     | 0.0000  |
|                | Lakia      | NS             | NS     | NS      | NS         | NS       | --     | 0.0000     | 0.0000  |
|                | Tolongoina | NS             | NS     | NS      | NS         | NS       | NS     | --         | 0.0000  |
|                | Manombo    | NS             | NS     | NS      | NS         | NS       | NS     | NS         | --      |
| N              |            | 11             | 10     | 8       | 12         | 10       | 10     | 4          | 11      |
